# Supplementary material
Source: PubMed Central journal article supplement (PMC8084281)

## Supplementary Information of the article of

“Proposal of novel natural inhibitors of severe acute respiratory syndrome coronavirus 2 main protease: Molecular docking and *ab initio* fragment molecular orbital calculations”

Divya Shaji, Shohei Yamamoto, Ryosuke Saito, Ryo Suzuki, Shunya Nakamura, and Noriyuki Kurita

### Contents

**Table S1** Chemical properties of the 12 compounds contained in *Moringa oleifera*. Their PubChem ID, molecular weight (MW), number of rotatable bonds (RB), number of H-bond acceptors (HBA), number of H-bond donors (HBD), octanol-water partition coefficient (LogP), and total polar surface area (TPSA) calculated by SwissADME web tool [23]. The number of rotatable bonds (RB) is counted by omitting the bonds connected to the hydrogen atoms.

**Figure S1** Conformations of compound docked to the ligand-binding site of the Mpro; the compounds in the first, second, and third ranked clusters are shown in yellow, blue, and pink. Charge distribution on the Mpro is shown in red (negative) and blue (positive).

**Figure S2** IFIEs (kcal/mol) between the Mpro residues and compound 1 for three clusters, and an interacting structure between Gln189 of the Mpro and compound 1 in the cluster 3. Hydrogen bonding and electrostatic interactions are indicated by red and blue lines, respectively.

**Figure S3** IFIEs (kcal/mol) between the Mpro residues and compound 2 for three clusters, and an interacting structure between the Mpro residues and compound 2 in the cluster 3. Hydrogen bonding and electrostatic interactions are indicated by red and blue lines, respectively.

**Figure S4** IFIEs (kcal/mol) between the Mpro residues and compound 3 for three clusters, and an interacting structure between the Mpro residues and compound 3 in the cluster 2. Hydrogen bonding and electrostatic interactions are indicated by red and blue lines, respectively.

**Figure S5** IFIEs (kcal/mol) between the Mpro residues and compound 4 for three clusters, and an interacting structure between the Mpro residues and compound 4 in the cluster 4. Electrostatic interactions are indicated by blue lines.

**Figure S6** IFIEs (kcal/mol) between the Mpro residues and compound 5 for three clusters, and an interacting structure between the Mpro residues and compound 5 in the cluster 2. Electrostatic interactions are indicated by blue lines.

**Figure S7** IFIEs (kcal/mol) between the Mpro residues and compound 6 for three clusters, and an interacting structure between the Mpro residues and compound 6 in the cluster 1. Hydrogen bonding and electrostatic interactions are indicated by red and blue lines, respectively.

**Figure S8** IFIEs (kcal/mol) between the Mpro residues and compound 7 for three clusters, and an interacting structure between the Mpro residues and compound 7 in the cluster 2. Electrostatic interactions are indicated by blue lines.

**Figure S9** IFIEs (kcal/mol) between the Mpro residues and compound 8 for three clusters, and an interacting structure between the Mpro residues and compound 8 in the cluster 2. Hydrogen bonding and electrostatic interactions are indicated by red and blue lines, respectively.

**Figure S10** IFIEs (kcal/mol) between the Mpro residues and compound 9 for three clusters, and an interacting structure between the Mpro residues and compound 9 in the cluster 6. Hydrogen bonding and electrostatic interactions are indicated by red and blue lines, respectively.

**Figure S11** IFIEs (kcal/mol) between the Mpro residues and compound 10 for three clusters, and an interacting structure between the Mpro residues and compound 10 in the cluster 2. Hydrogen bonding, electrostatic, and NH- $\pi$  interactions are indicated by red, blue, and orange lines, respectively.

**Figure S12** IFIEs (kcal/mol) between the Mpro residues and compound 11 for three clusters, and an interacting structure between the Mpro residues and compound 11 in the cluster 1. Hydrogen bonding and electrostatic interactions are indicated by red and blue lines, respectively.

**Figure S13** IFIEs (kcal/mol) between the Mpro residues and compound 12 for three clusters, and an interacting structure between the Mpro residues and compound 12 in the cluster 2. Hydrogen bonding, electrostatic, and NH- $\pi$  interactions are indicated by red, blue, and orange lines, respectively.

**Table S1** Chemical properties of the 12 compounds contained in *Moringa oleifera*. Their PubChem ID, molecular weight (MW), number of rotatable bonds (RB), number of H-bond acceptors (HBA), number of H-bond donors (HBD), octanol-water partition coefficient (LogP), and total polar surface area (TPSA) calculated by SwissADME web tool [23]. The number of rotatable bonds (RB) is counted by omitting the bonds connected to the hydrogen atoms.

| Compound                      | PubChem ID | MW (g/mol) | RB | HBA | HBD | LogP | TPSA (Å <sup>2</sup> ) |
|-------------------------------|------------|------------|----|-----|-----|------|------------------------|
| (1) Morphine                  | 5288826    | 285.3      | 0  | 4   | 2   | 1.41 | 52.93                  |
| (2) Kaempferol                | 5280863    | 286.2      | 1  | 6   | 4   | 1.58 | 111.13                 |
| (3) Quercetin                 | 5280343    | 302.2      | 1  | 7   | 5   | 1.23 | 131.36                 |
| (4) Pterygospermin            | 72201063   | 406.5      | 4  | 2   | 0   | 3.75 | 89.12                  |
| (5) Benzoic acid              | 243        | 122.1      | 1  | 2   | 1   | 1.44 | 37.30                  |
| (6) Gallic acid               | 370        | 170.1      | 1  | 5   | 4   | 0.21 | 97.99                  |
| (7) Benzyl isothiocyanate     | 2346       | 149.2      | 2  | 1   | 0   | 2.91 | 44.45                  |
| (8) Niazirin                  | 129556     | 279.3      | 3  | 6   | 3   | 0.20 | 102.94                 |
| (9) Niaziminin                | 10023860   | 399.5      | 9  | 7   | 3   | 1.47 | 138.57                 |
| (10) Niazinin                 | 10088810   | 343.4      | 6  | 6   | 4   | 0.59 | 132.50                 |
| (11) O-Ethyl N-carbamothioate | 10247749   | 357.4      | 7  | 6   | 4   | 0.97 | 132.50                 |
| (12) Niazirinin               | 10426197   | 321.3      | 5  | 7   | 2   | 0.82 | 109.01                 |

**Figure S1** Conformations of compound docked to the ligand-binding site of the Mpro; the compounds in the first, second, and third ranked clusters are shown in yellow, blue, and pink. Charge distribution on the Mpro is shown in red (negative) and blue (positive).

(a) Compound 1

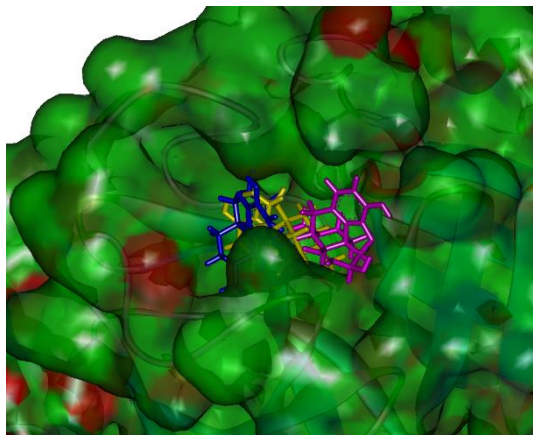

(b) Compound 2

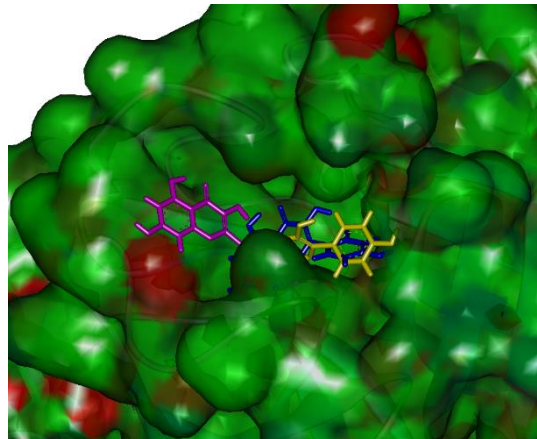

(c) Compound 3

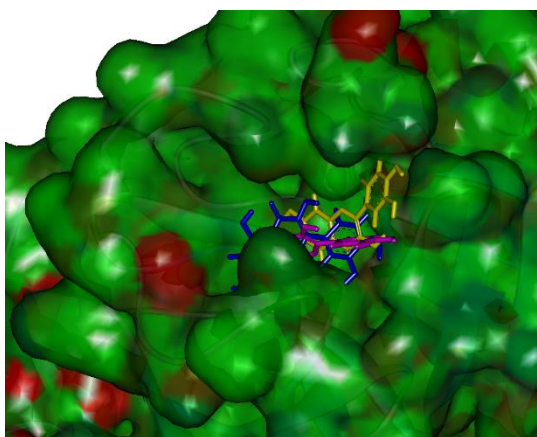

(d) Compound 4

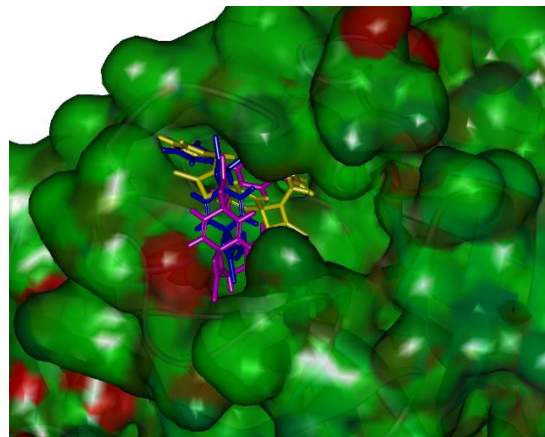

(e) Compound 5

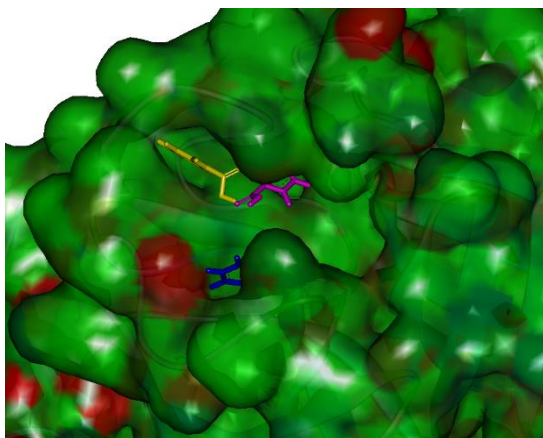

(f) Compound 6

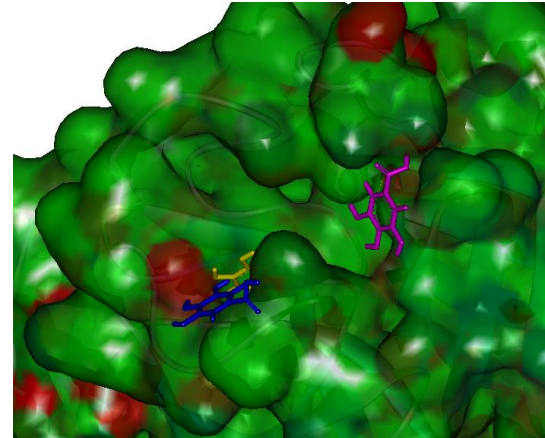

(g) Compound 7

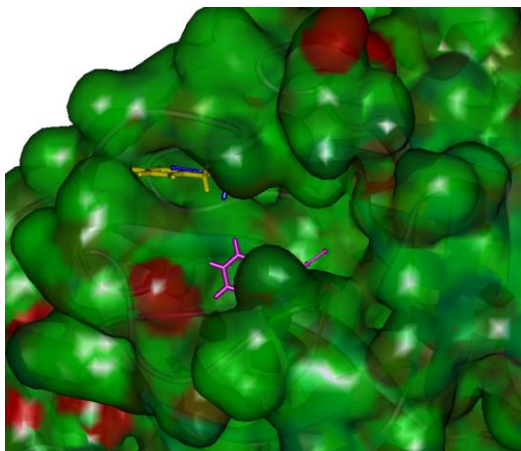

(h) Compound 8

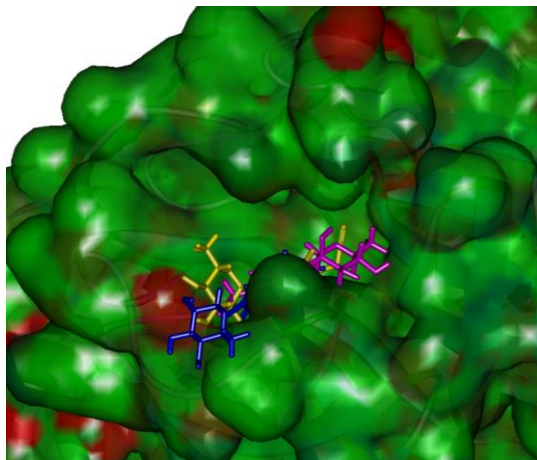

(i) Compound 9

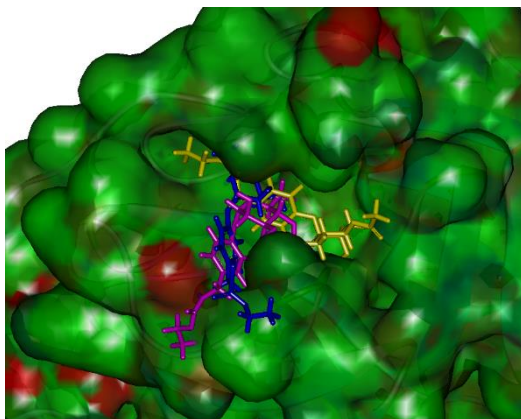

(j) Compound 10

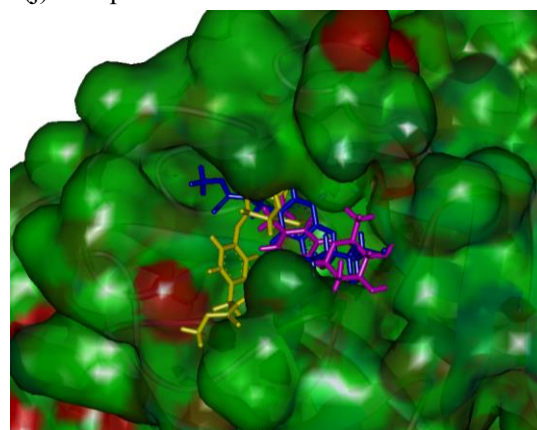

(k) Compound 11

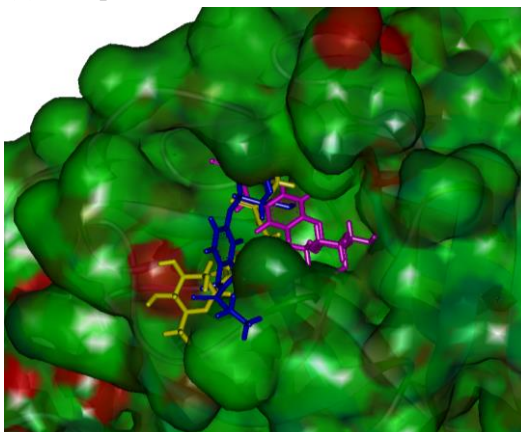

(l) Compound 12

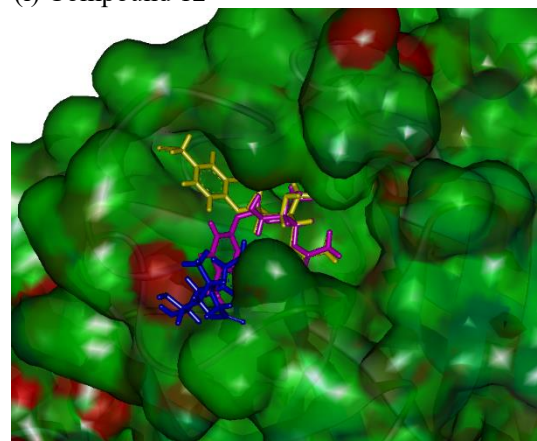

**Figure S2** IFIEs (kcal/mol) between the Mpro residues and compound 1 for three clusters, and an interacting structure between Gln189 of the Mpro and compound 1 in the cluster 3. Hydrogen bonding and electrostatic interactions are indicated by red and blue lines, respectively.

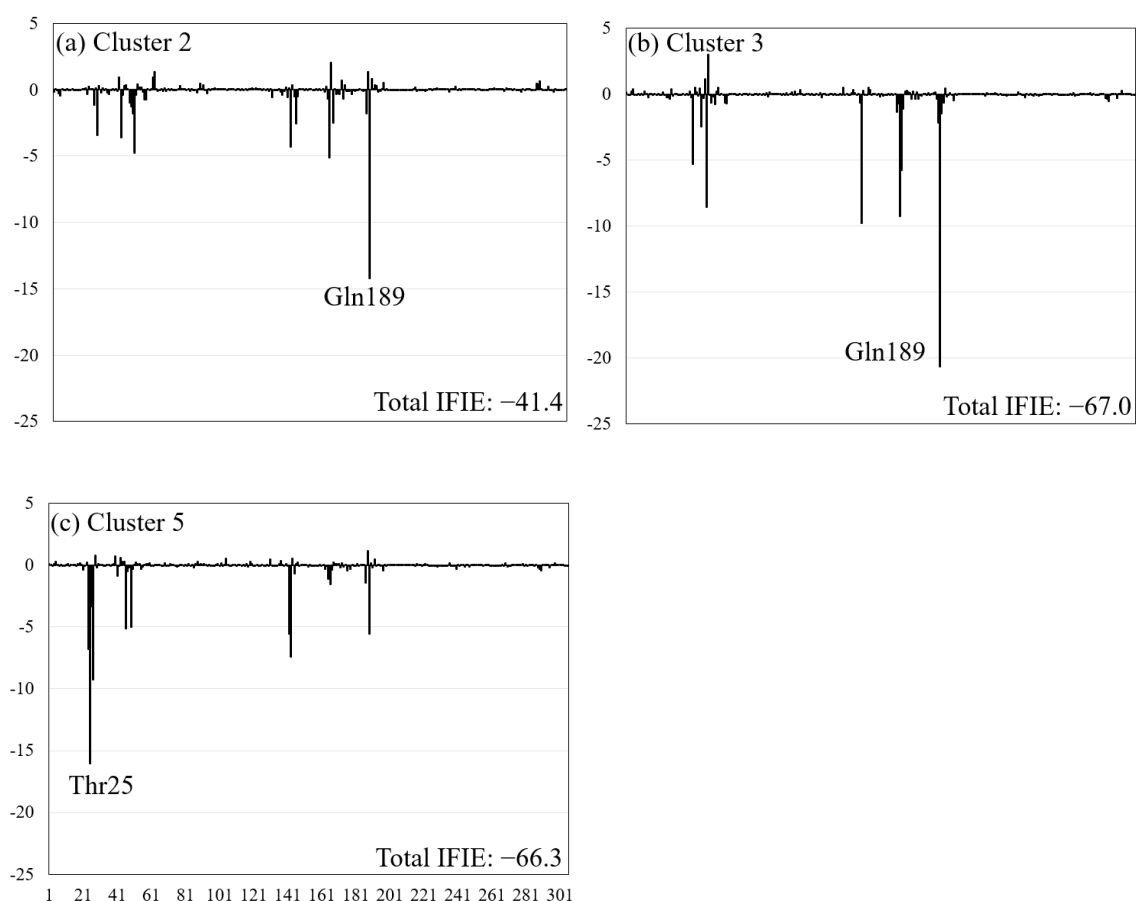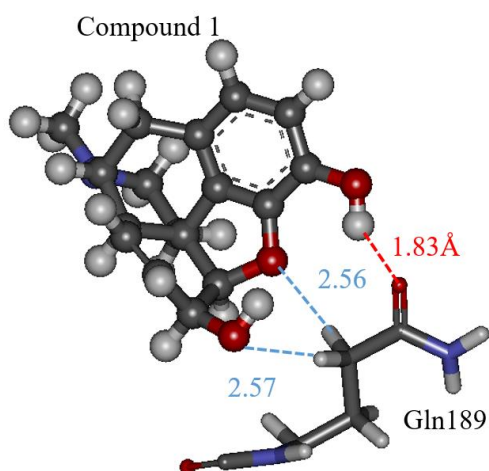

**Figure S3** IFIEs (kcal/mol) between the Mpro residues and compound 2 for three clusters, and an interacting structure between the Mpro residues and compound 2 in the cluster 3. Hydrogen bonding and electrostatic interactions are indicated by red and blue lines, respectively.

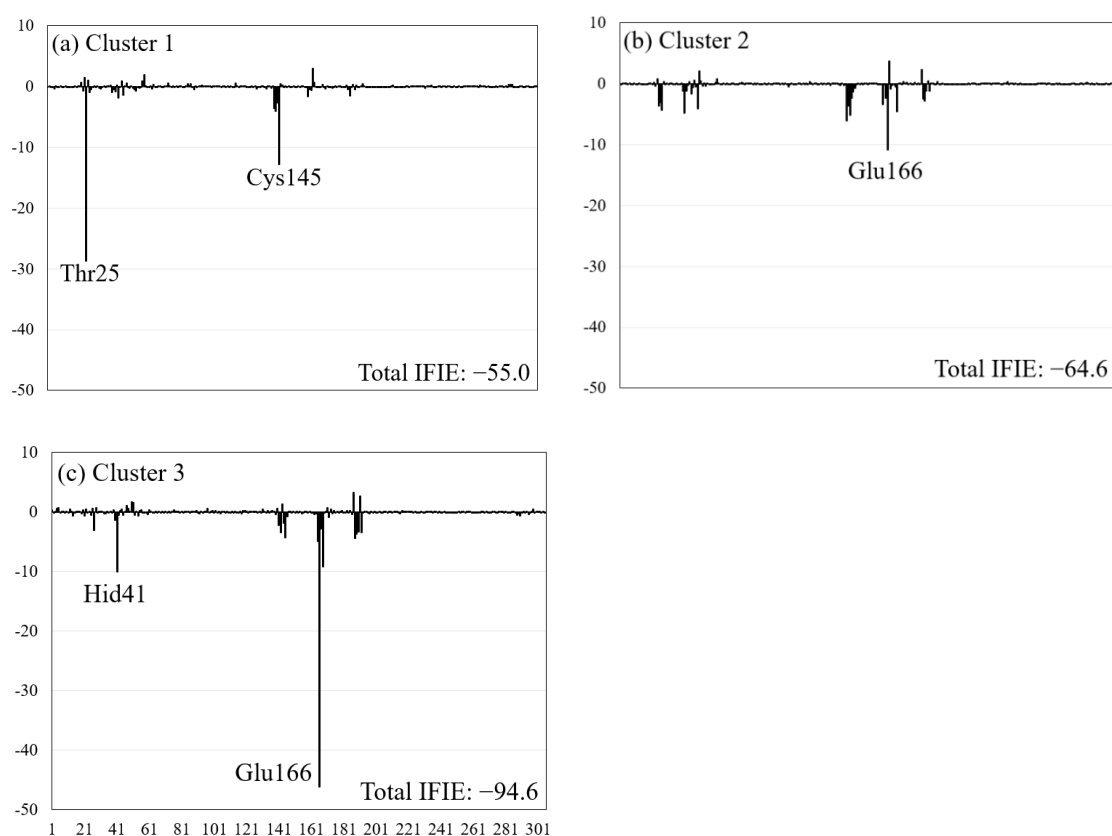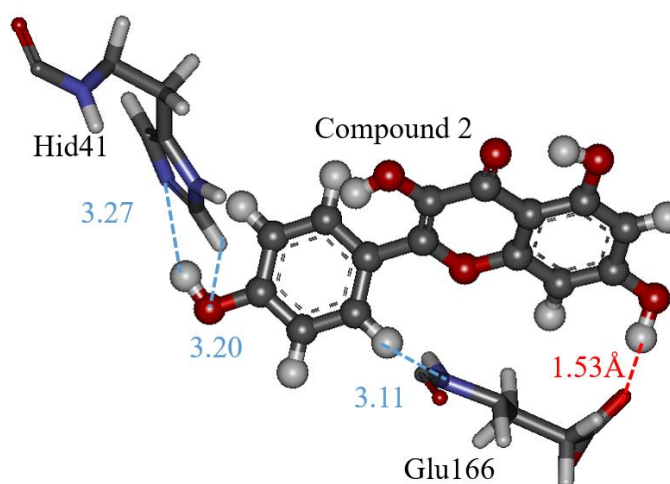

**Figure S4** IFIEs (kcal/mol) between the Mpro residues and compound 3 for three clusters, and an interacting structure between the Mpro residues and compound 3 in the cluster 2. Hydrogen bonding and electrostatic interactions are indicated by red and blue lines, respectively.

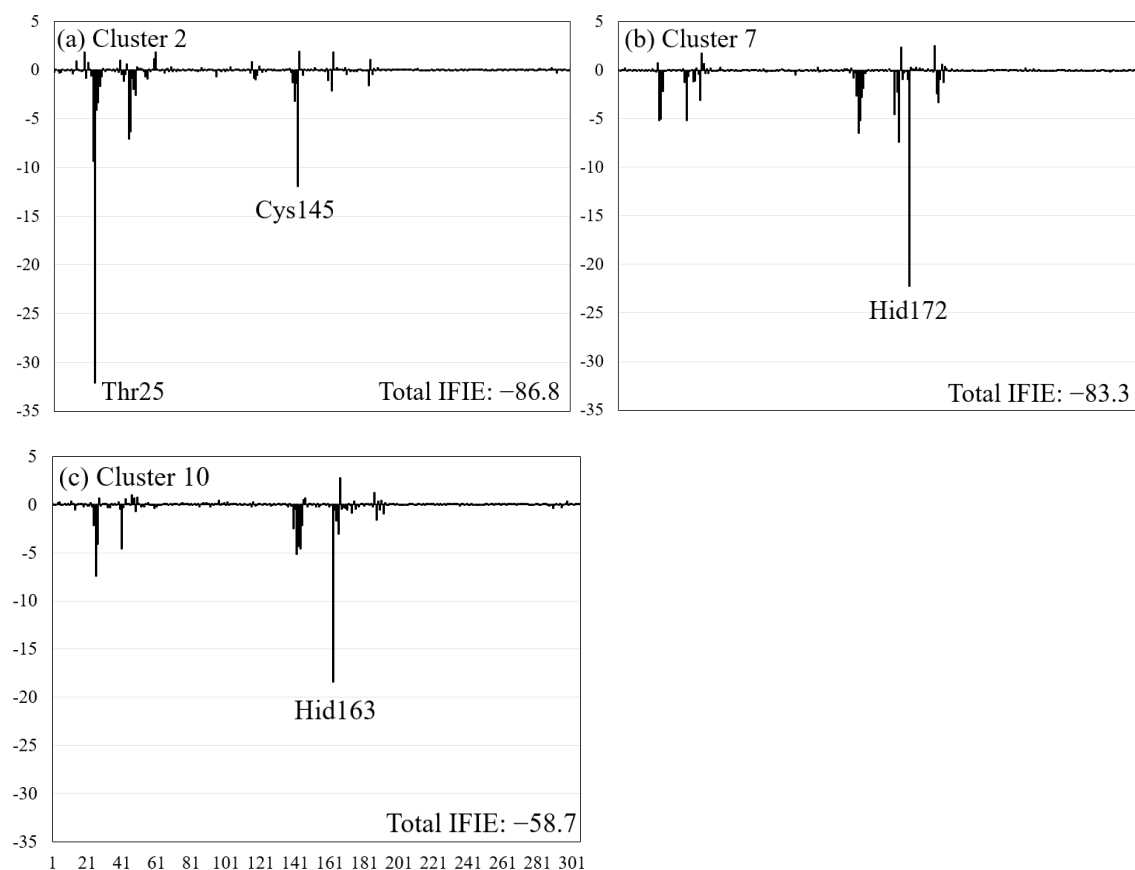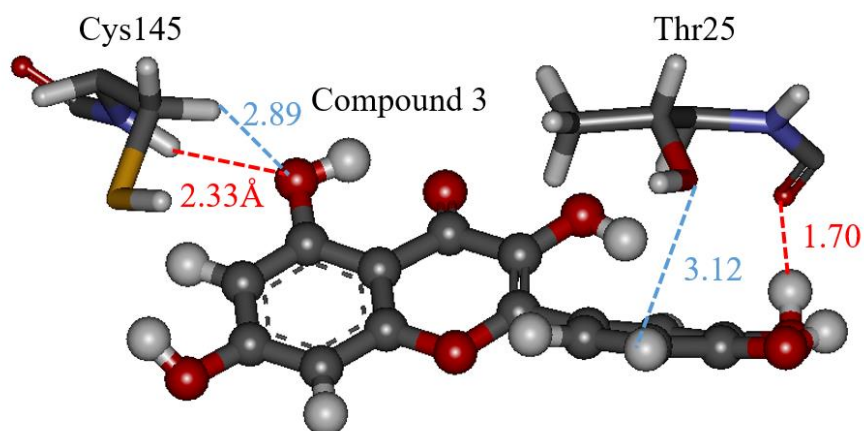

**Figure S5** IFIEs (kcal/mol) between the Mpro residues and compound 4 for three clusters, and an interacting structure between the Mpro residues and compound 4 in the cluster 4. Electrostatic interactions are indicated by blue lines.

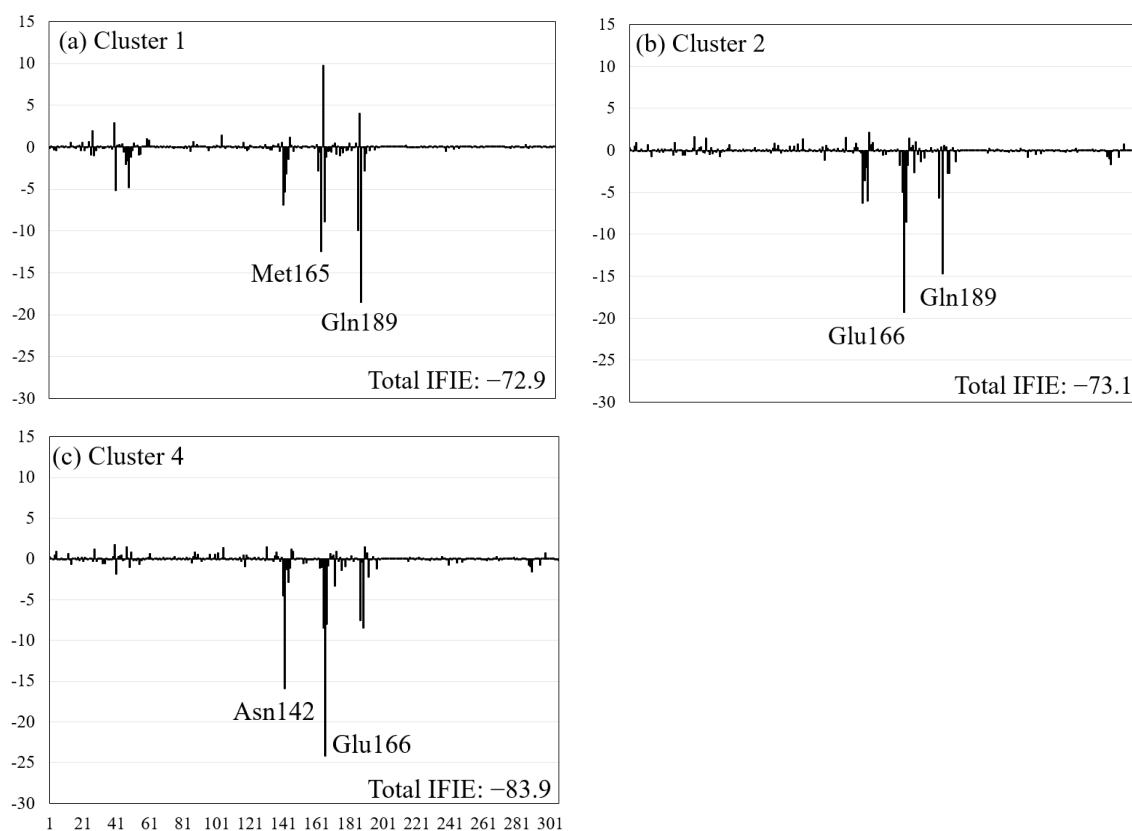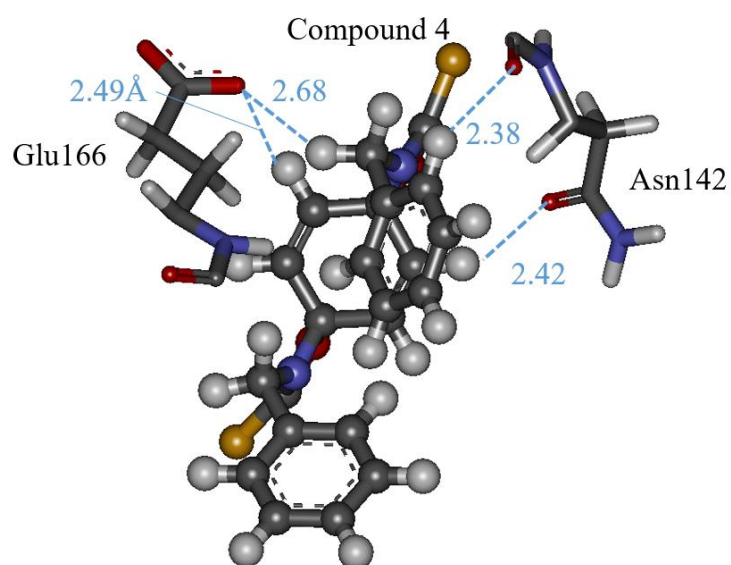

**Figure S6** IFIEs (kcal/mol) between the Mpro residues and compound 5 for three clusters, and an interacting structure between the Mpro residues and compound 5 in the cluster 2. Electrostatic interactions are indicated by blue lines.

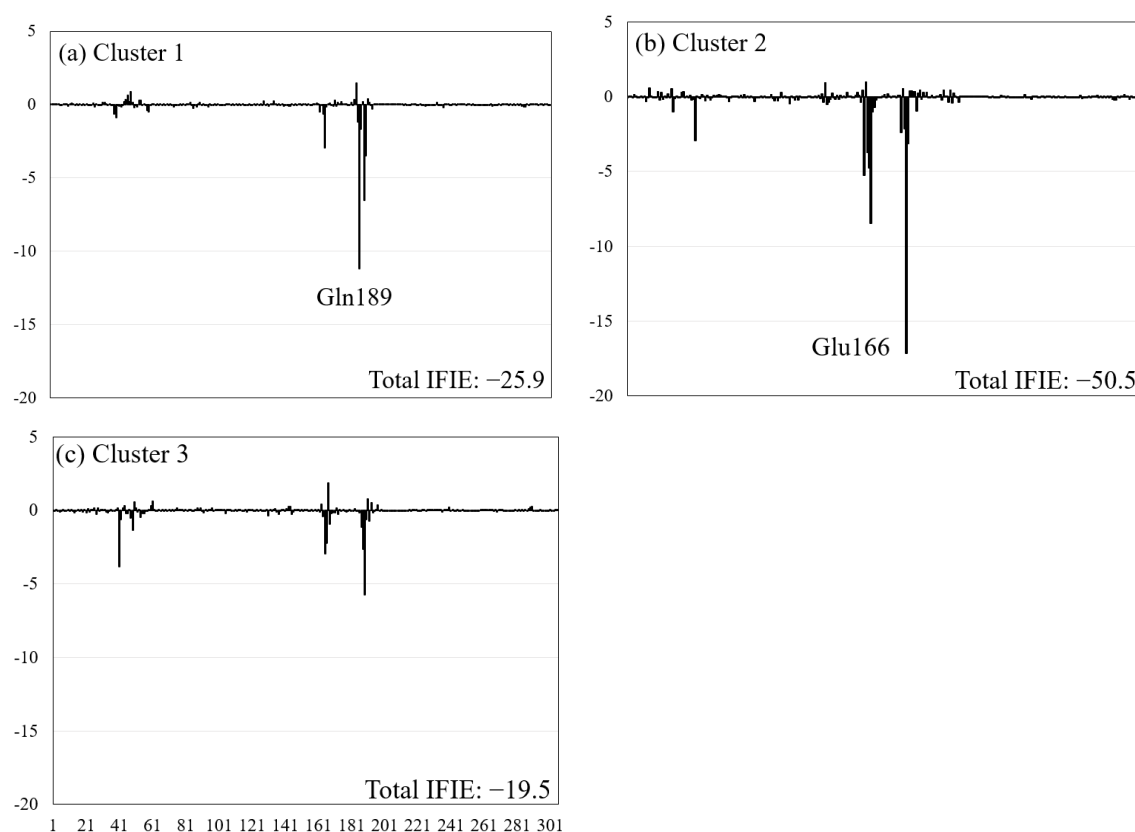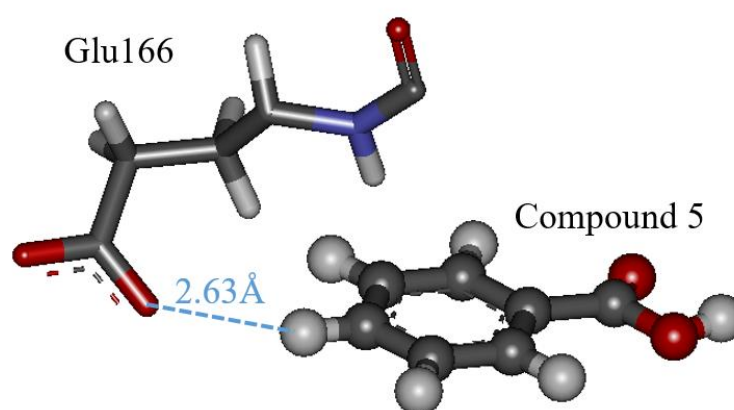

**Figure S7** IFIEs (kcal/mol) between the Mpro residues and compound 6 for three clusters, and an interacting structure between the Mpro residues and compound 6 in the cluster 1. Hydrogen bonding and electrostatic interactions are indicated by red and blue lines, respectively.

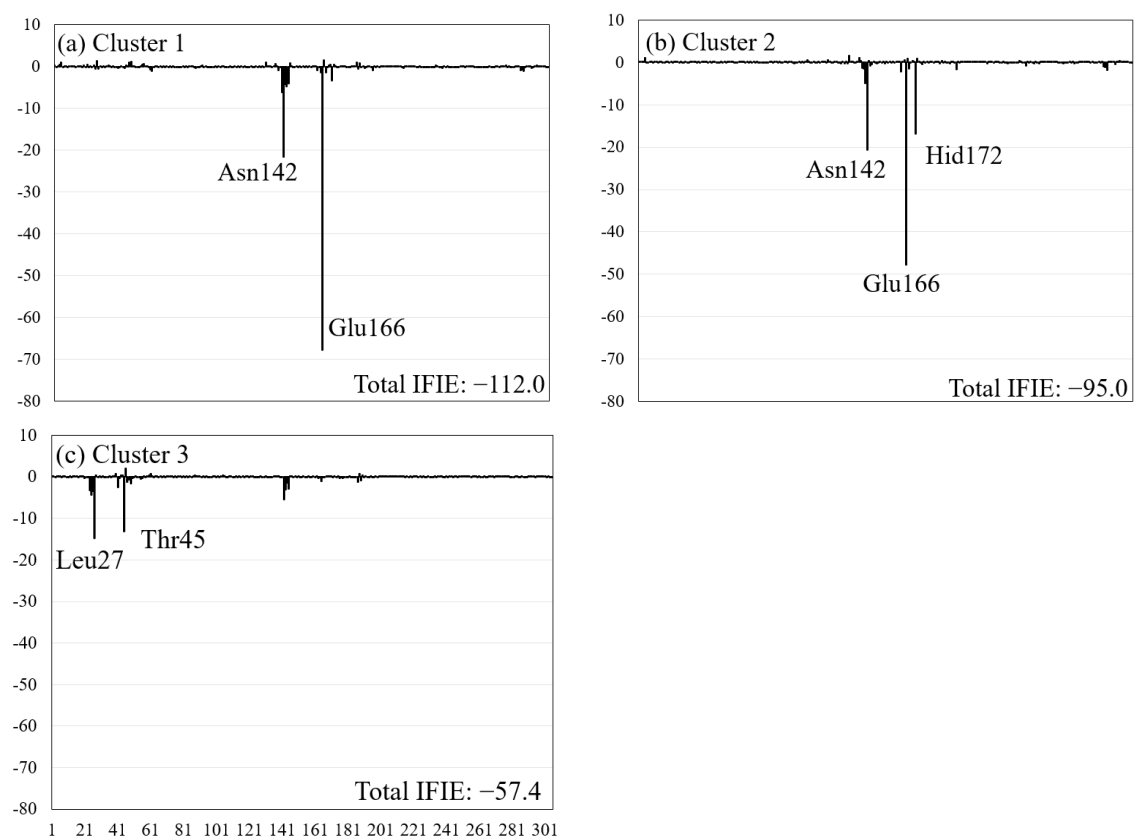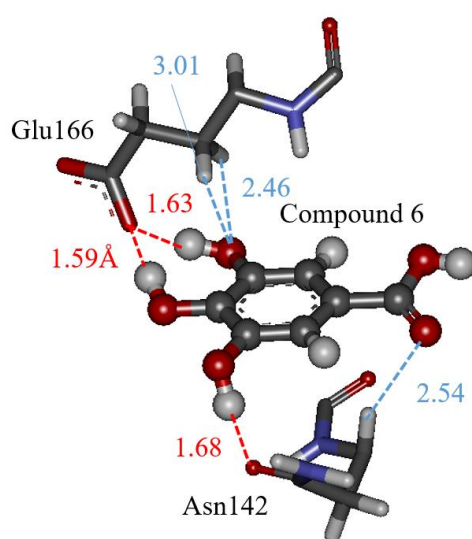

**Figure S8** IFIEs (kcal/mol) between the Mpro residues and compound 7 for three clusters, and an interacting structure between the Mpro residues and compound 7 in the cluster 2. Electrostatic interactions are indicated by blue lines.

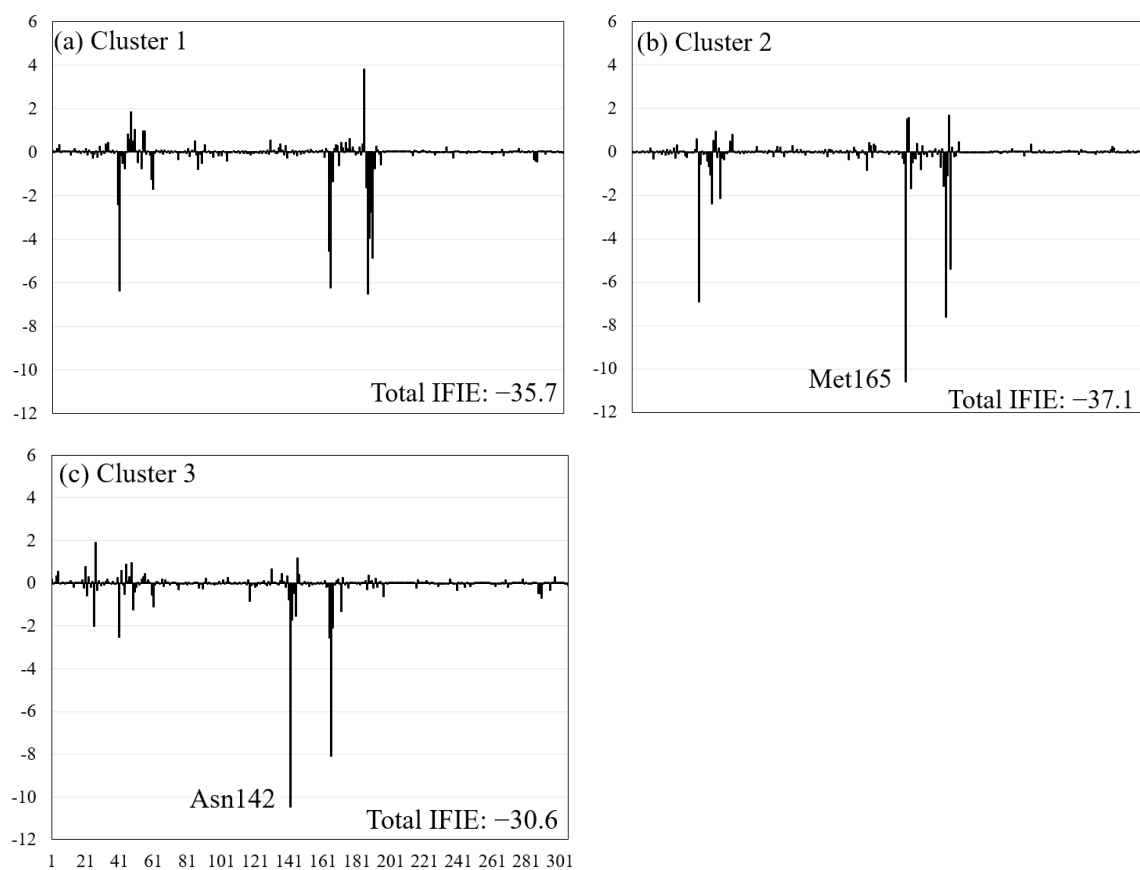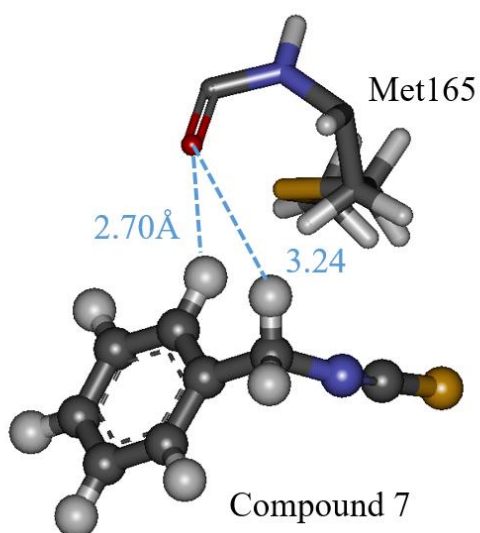

**Figure S9** IFIEs (kcal/mol) between the Mpro residues and compound 8 for three clusters, and an interacting structure between the Mpro residues and compound 8 in the cluster 2. Hydrogen bonding and electrostatic interactions are indicated by red and blue lines, respectively.

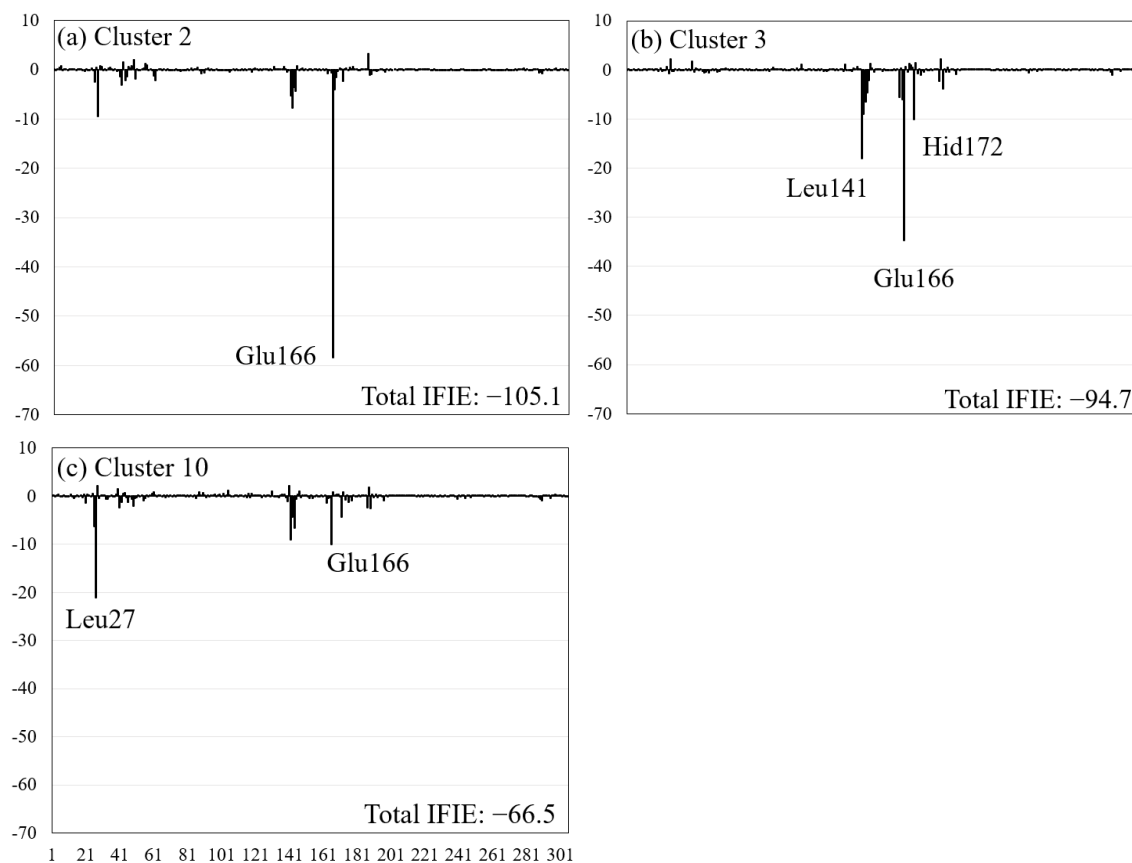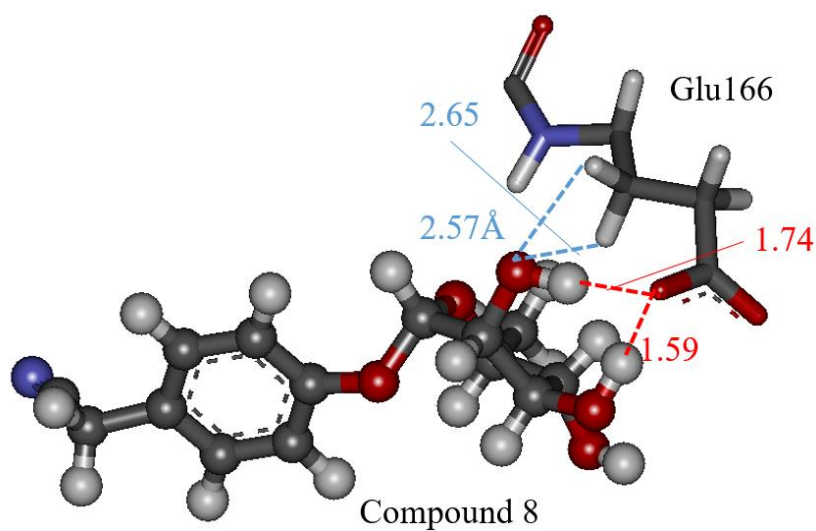

**Figure S10** IFIEs (kcal/mol) between the Mpro residues and compound 9 for three clusters, and an interacting structure between the Mpro residues and compound 9 in the cluster 6. Hydrogen bonding and electrostatic interactions are indicated by red and blue lines, respectively.

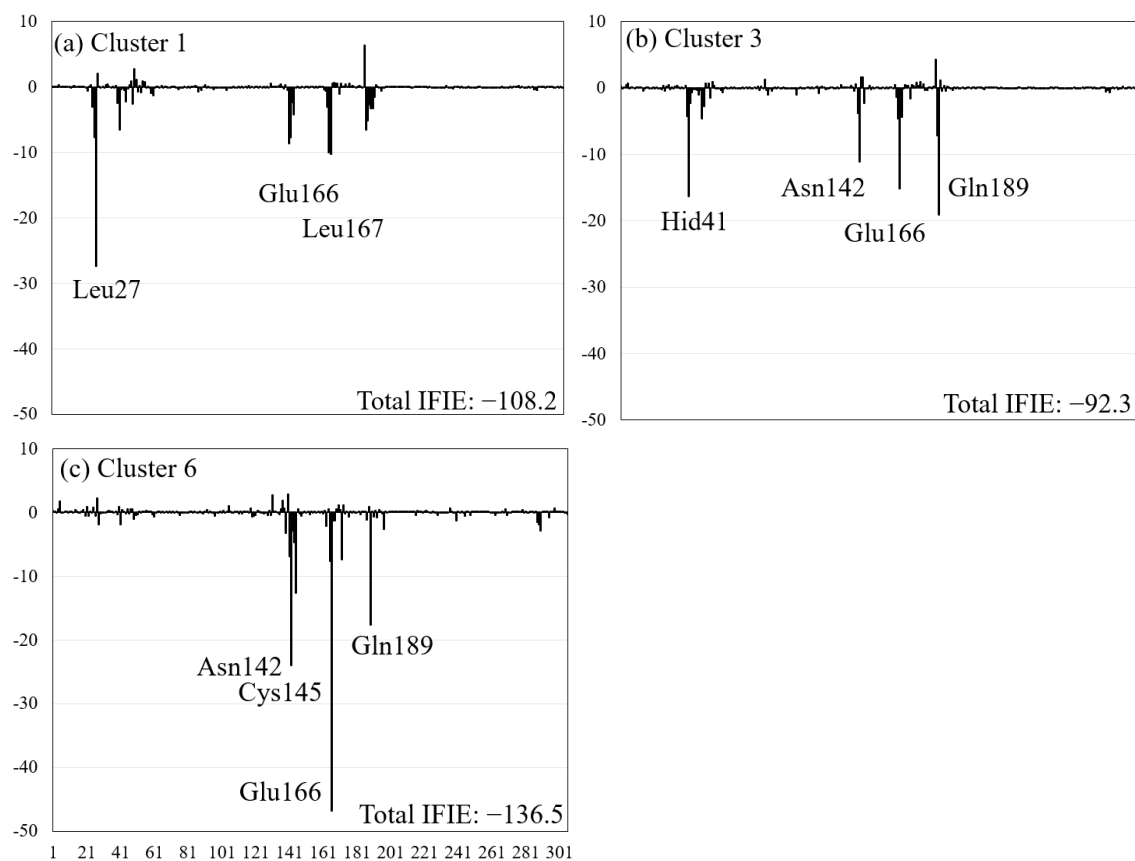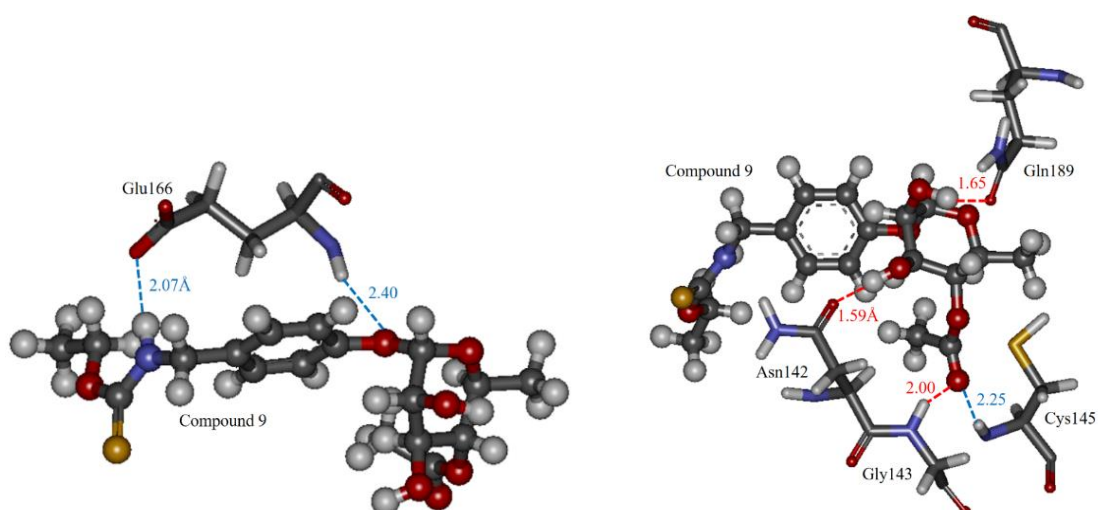

**Figure S11** IFIEs (kcal/mol) between the Mpro residues and compound 10 for three clusters, and an interacting structure between the Mpro residues and compound 10 in the cluster 2. Hydrogen bonding, electrostatic, and NH- $\pi$  interactions are indicated by red, blue, and orange lines, respectively.

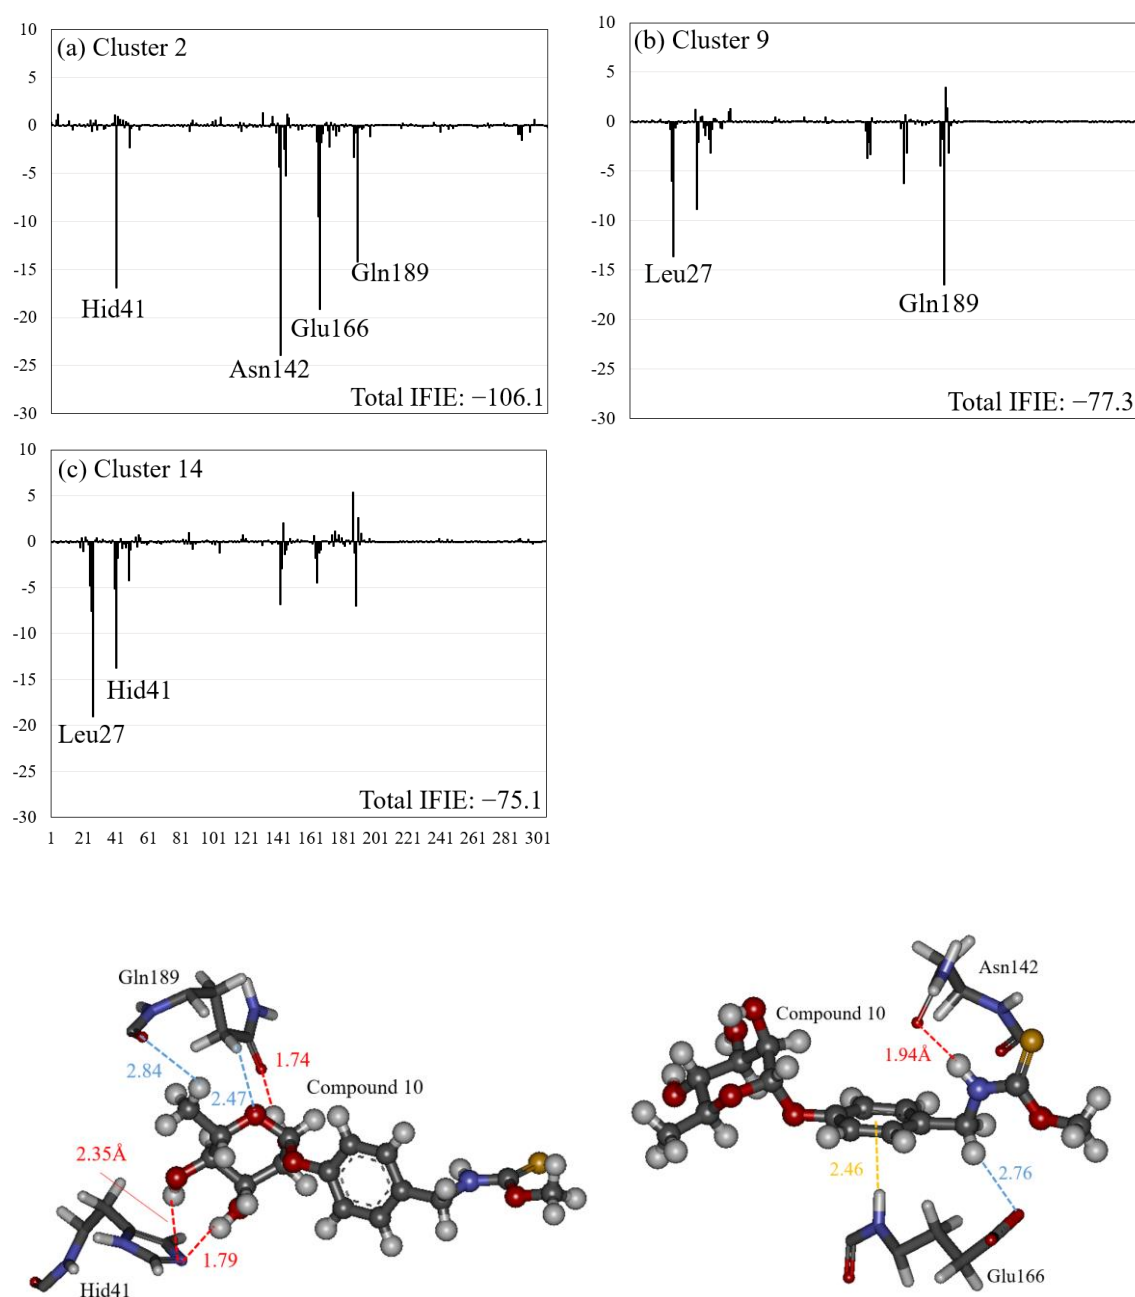

**Figure S12** IFIEs (kcal/mol) between the Mpro residues and compound 11 for three clusters, and an interacting structure between the Mpro residues and compound 11 in the cluster 1. Hydrogen bonding and electrostatic interactions are indicated by red and blue lines, respectively.

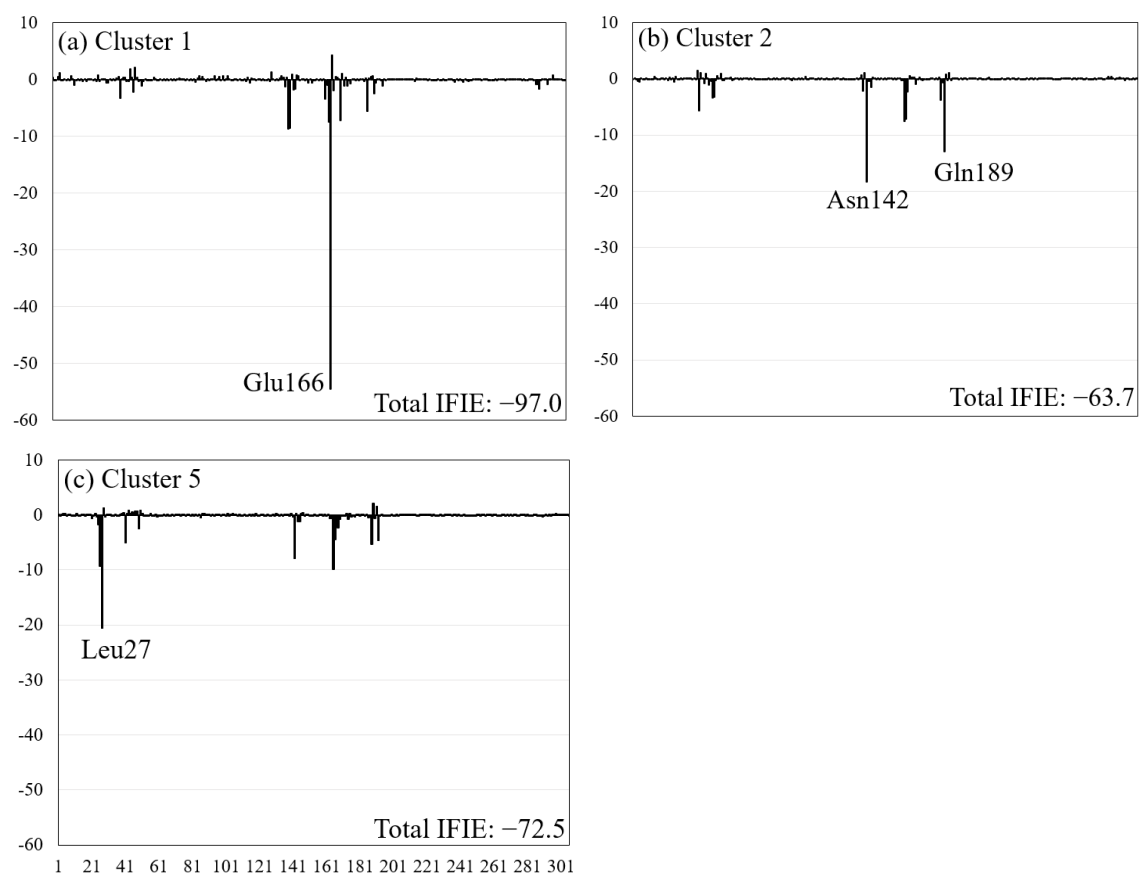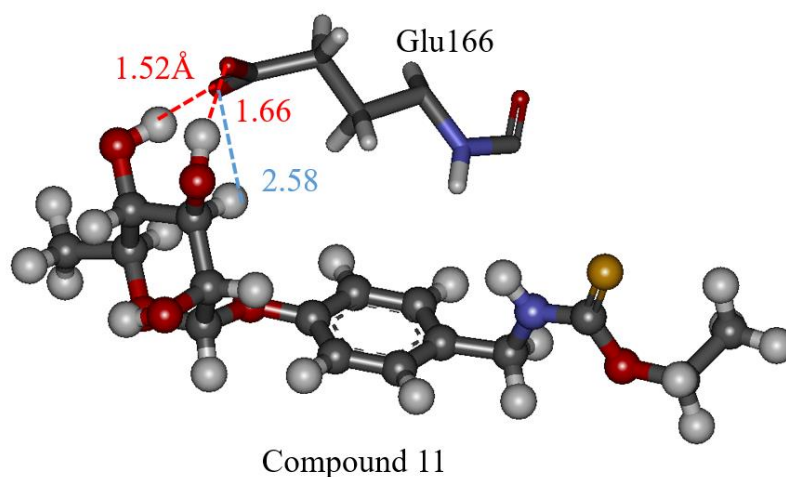

**Figure S13** IFIEs (kcal/mol) between the Mpro residues and compound 12 for three clusters, and an interacting structure between the Mpro residues and compound 12 in the cluster 2. Hydrogen bonding, electrostatic, and NH- $\pi$  interactions are indicated by red, blue, and orange lines, respectively.

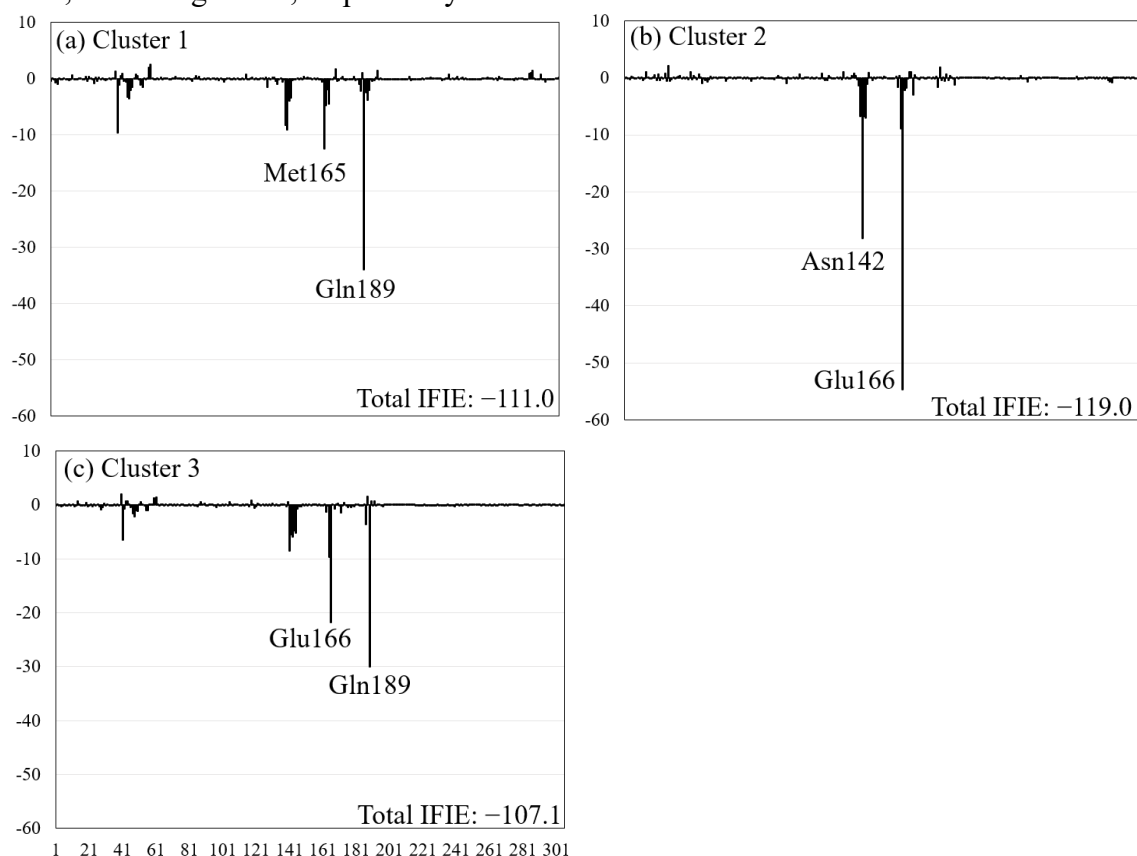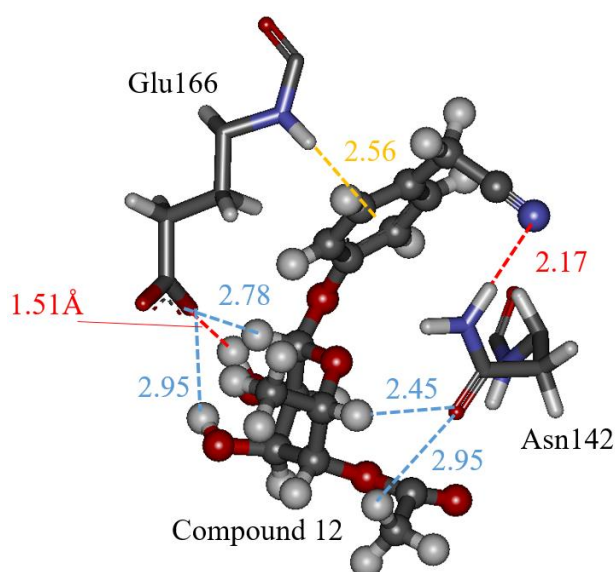

Supplement: mmc1.pdf [file mmc1.pdf]
